# Supplementary material for: Application and Evaluation of a Multimodal Training on the Second Victim Phenomenon at the European Researchers’ Network Working on Second Victims Training School: Mixed Methods Study
Source: JMIR Form Res. 2024 Aug 30;8:e58727. doi: 10.2196/58727 (PMC11418314; doi:10.2196/58727)
Supplement: Multimedia Appendix 7 [file formative_v8i1e58727_app7.docx]

**Multimedia Appendix 7**

**SPSS software (version 19.0.1.1; IBM Corp) output.**

1. **Responses to the online questionnaire**

**1.1. Question - The leaning goals were clear**

| **Chi-Square Tests** | | | | | | | | | |
| --- | --- | --- | --- | --- | --- | --- | --- | --- | --- |
|  | Value | df | Asymptotic Significance (2-sided) | Monte Carlo Sig. (2-sided) | | | Monte Carlo Sig. (1-sided) | | |
| Significance | 99% Confidence Interval | | Significance | 99% Confidence Interval | |
| Lower Bound | Upper Bound | Lower Bound | Upper Bound |
| Pearson Chi-Square | 1.901a | 2 | .387 | .344b | .332 | .357 |  |  |  |
| Likelihood Ratio | 1.937 | 2 | .380 | .344b | .332 | .357 |  |  |  |
| Fisher-Freeman-Halton Exact Test | 1.980 |  |  | .344b | .332 | .357 |  |  |  |
| Linear-by-Linear Association | .907c | 1 | .341 | .356b | .343 | .368 | .221b | .211 | .232 |
| N of Valid Cases | 108 |  |  |  |  |  |  |  |  |
| a. 2 cells (33.3%) have expected count less than 5. The minimum expected count is 1.93. | | | | | | | | | |
| b. Based on 10000 sampled tables with starting seed 2000000. | | | | | | | | | |
| c. The standardised statistic is -.953. | | | | | | | | | |

**1.2 Question –** The scenario was realistic comparing to the current healthcare practice

| **Chi-Square Tests** | | | | | | | | | |
| --- | --- | --- | --- | --- | --- | --- | --- | --- | --- |
|  | Value | df | Asymptotic Significance (2-sided) | Monte Carlo Sig. (2-sided) | | | Monte Carlo Sig. (1-sided) | | |
| Significance | 99% Confidence Interval | | Significance | 99% Confidence Interval | |
| Lower Bound | Upper Bound | Lower Bound | Upper Bound |
| Pearson Chi-Square | 1.788a | 2 | .409 | .405b | .392 | .417 |  |  |  |
| Likelihood Ratio | 1.836 | 2 | .399 | .405b | .392 | .417 |  |  |  |
| Fisher-Freeman-Halton Exact Test | 1.852 |  |  | .364b | .351 | .376 |  |  |  |
| Linear-by-Linear Association | .710c | 1 | .400 | .434b | .422 | .447 | .263b | .252 | .274 |
| N of Valid Cases | 108 |  |  |  |  |  |  |  |  |
| a. 2 cells (33.3%) have expected count less than 5. The minimum expected count is 1.93. | | | | | | | | | |
| b. Based on 10000 sampled tables with starting seed 957002199. | | | | | | | | | |
| c. The standardised statistic is -.843. | | | | | | | | | |

**1.3 Question -** The content of the case study was clear

| **Chi-Square Tests** | | | | | | | | | | |
| --- | --- | --- | --- | --- | --- | --- | --- | --- | --- | --- |
|  | Value | df | Asymptotic Significance (2-sided) | Monte Carlo Sig. (2-sided) | | | Monte Carlo Sig. (1-sided) | | | |
| Significance | 99% Confidence Interval | | Significance | 99% Confidence Interval | |
| Lower Bound | Upper Bound | Lower Bound | Upper Bound |
| Pearson Chi-Square | 1.865a | 2 | .393 | .418b | .405 | .430 |  |  |  |
| Likelihood Ratio | 2.260 | 2 | .323 | .418b | .405 | .430 |  |  |  |
| Fisher-Freeman-Halton Exact Test | 1.783 |  |  | .418b | .405 | .430 |  |  |  |
| Linear-by-Linear Association | 1.660c | 1 | .198 | .228b | .217 | .239 | .145b | .136 | .154 |
| N of Valid Cases | 108 |  |  |  |  |  |  |  |  |
| a. 2 cells (33.3%) have expected count less than 5. The minimum expected count is .48. | | | | | | | | | | |
| b. Based on 10000 sampled tables with starting seed 79654295. | | | | | | | | | | |
| c. The standardised statistic is -1.288. | | | | | | | | | | |

1.4 **Question -**The supporting information of the case studies (explanations/examples/other sources suggestions) was clear.

| **SUPPORTINF * EDITION Crosstabulation** | | | | |
| --- | --- | --- | --- | --- |
| Count | | | | |
|  | | EDITION | | Total |
| 1st edition | 2nd edition |
| SUPPORTINF | partially disagree | 1 | 2 | 3 |
| partially agree | 7 | 5 | 12 |
| fully agree | 28 | 30 | 58 |
| Total | | 36 | 37 | 73 |

| **Chi-Square Tests** | | | | | | | | | | |
| --- | --- | --- | --- | --- | --- | --- | --- | --- | --- | --- |
|  | Value | df | Asymptotic Significance (2-sided) | Monte Carlo Sig. (2-sided) | | | Monte Carlo Sig. (1-sided) | | |
| Significance | 99% Confidence Interval | | Significance | 99% Confidence Interval | |
| Lower Bound | Upper Bound | Lower Bound | Upper Bound |
| Pearson Chi-Square | .722a | 2 | .697 | .729b | .718 | .741 |  |  |  |
| Likelihood Ratio | .730 | 2 | .694 | .729b | .718 | .741 |  |  |  |
| Fisher-Freeman-Halton Exact Test | .818 |  |  | .729b | .718 | .741 |  |  |  |
| Linear-by-Linear Association | .003c | 1 | .956 | 1.000b | 1.000 | 1.000 | .557b | .544 | .570 |
| N of Valid Cases | 73 |  |  |  |  |  |  |  |  |
| a. 2 cells (33.3%) have expected count less than 5. The minimum expected count is 1.48. | | | | | | | | | | |
| b. Based on 10000 sampled tables with starting seed 1993510611. | | | | | | | | | | |
| c. The standardised statistic is .055. | | | | | | | | | | |

1.5 Question - The knowledge obtained from the case study will (positively) affect my daily practice.

| **IMPACT PRACTICE * EDITION Crosstabulation** | | | | |
| --- | --- | --- | --- | --- |
| Count | | | | |
|  | | EDITION | | Total |
| 1st edition | 2nd edition |
| PRACTICE | Partially disagree | 3 | 1 | 4 |
| Partially agree | 7 | 16 | 23 |
| Fully agree | 42 | 39 | 81 |
| Total | | 52 | 56 | 108 |

| **Chi-Square Tests** | | | | | | | | | |
| --- | --- | --- | --- | --- | --- | --- | --- | --- | --- |
|  | Value | df | Asymptotic Significance (2-sided) | Monte Carlo Sig. (2-sided) | | | Monte Carlo Sig. (1-sided) | | |
| Significance | 99% Confidence Interval | | Significance | 99% Confidence Interval | |
| Lower Bound | Upper Bound | Lower Bound | Upper Bound |
| Pearson Chi-Square | 4.491a | 2 | .106 | .127b | .118 | .135 |  |  |  |
| Likelihood Ratio | 4.627 | 2 | .099 | .172b | .162 | .181 |  |  |  |
| Fisher-Freeman-Halton Exact Test | 4.380 |  |  | .107b | .099 | .115 |  |  |  |
| Linear-by-Linear Association | .489c | 1 | .484 | .584b | .572 | .597 | .304b | .292 | .315 |
| N of Valid Cases | 108 |  |  |  |  |  |  |  |  |
| a. 2 cells (33.3%) have expected count less than 5. The minimum expected count is 1.93. | | | | | | | | | |
| b. Based on 10000 sampled tables with starting seed 2000000. | | | | | | | | | |
| c. The standardised statistic is -.699. | | | | | | | | | |

1.6- Question 6- I will recommend this case study to my colleagues to learn more about the second victim phenomenon.

| **Recommend * EDITION Crosstabulation** | | | | |
| --- | --- | --- | --- | --- |
| Count | | | | |
|  | | EDITION | | Total |
| 1 | 2 |
| Recommend | fully disagree | 0 | 1 | 1 |
| partially disagree | 3 | 1 | 4 |
| partially agree | 5 | 13 | 18 |
| fully agree | 44 | 41 | 85 |
| Total | | 52 | 56 | 108 |

| **Chi-Square Tests** | | | | | | | | | | |
| --- | --- | --- | --- | --- | --- | --- | --- | --- | --- | --- |
|  | Value | df | Asymptotic Significance (2-sided) | Monte Carlo Sig. (2-sided) | | | Monte Carlo Sig. (1-sided) | | | |
| Significance | 99% Confidence Interval | | Significance | 99% Confidence Interval | |
| Lower Bound | Upper Bound | Lower Bound | Upper Bound |
| Pearson Chi-Square | 5.521a | 3 | .137 | .117b | .109 | .125 |  |  |  |
| Likelihood Ratio | 6.073 | 3 | .108 | .169b | .159 | .178 |  |  |  |
| Fisher-Freeman-Halton Exact Test | 5.332 |  |  | .113b | .104 | .121 |  |  |  |
| Linear-by-Linear Association | .989c | 1 | .320 | .409b | .396 | .422 | .210b | .200 | .220 |
| N of Valid Cases | 108 |  |  |  |  |  |  |  |  |
| a. 4 cells (50.0%) have expected count less than 5. The minimum expected count is .48. | | | | | | | | | | |
| b. Based on 10000 sampled tables with starting seed 624387341. | | | | | | | | | | |
| c. The standardised statistic is -.995. | | | | | | | | | | |

- 1. Question 7- Do you consider that the time for working group discussion was adequate to achieve the learning goals?

| **TIME for WG Discussion * EDITION Crosstabulation** | | | | |
| --- | --- | --- | --- | --- |
| Count | | | | |
|  | | EDITION | | Total |
| 1.00 | 2.00 |
| TIMEDISC | The time was too short | 1 | 7 | 8 |
| Time was longer than necessary | 3 | 2 | 5 |
| Time was adequate | 35 | 47 | 82 |
| Prefer not to answer | 13 | 0 | 13 |
| Total | | 52 | 56 | 108 |

| **Chi-Square Tests** | | | | | | | | | | |
| --- | --- | --- | --- | --- | --- | --- | --- | --- | --- | --- |
|  | Value | df | Asymptotic Significance (2-sided) | Monte Carlo Sig. (2-sided) | | | Monte Carlo Sig. (1-sided) | | |
| Significance | 99% Confidence Interval | | Significance | 99% Confidence Interval | |
| Lower Bound | Upper Bound | Lower Bound | Upper Bound |
| Pearson Chi-Square | 19.334a | 3 | <.001 | <.001b | <.001 | <.001 |  |  |  |
| Likelihood Ratio | 24.899 | 3 | <.001 | <.001b | <.001 | <.001 |  |  |  |
| Fisher-Freeman-Halton Exact Test | 21.271 |  |  | <.001b | <.001 | <.001 |  |  |  |
| Linear-by-Linear Association | 11.282c | 1 | <.001 | <.001b | <.001 | .002 | <.001b | <.001 | <.001 |
| N of Valid Cases | 108 |  |  |  |  |  |  |  |  |
| a. 4 cells (50.0%) have expected count less than 5. The minimum expected count is 2.41. | | | | | | | | | | |
| b. Based on 10000 sampled tables with starting seed 957002199. | | | | | | | | | | |
| c. The standardised statistic is -3.359. | | | | | | | | | | |

- 1. Question 8- Do you consider that the time to prepare the presentation of the main conclusions of the working group discussion was adequate?

| **TIME Presentation Preparation * EDITION Crosstabulation** | | | | |
| --- | --- | --- | --- | --- |
| Count | | | | |
|  | | EDITION | | Total |
| 1.00 | 2.00 |
| TIMEPREP | The time was to short | 5 | 7 | 12 |
| The time was longer than necessary | 2 | 1 | 3 |
| The time was adequate | 23 | 48 | 71 |
| Prefer not to answer | 22 | 0 | 22 |
| Total | | 52 | 56 | 108 |

| **Chi-Square Tests** | | | | | | | | | |
| --- | --- | --- | --- | --- | --- | --- | --- | --- | --- |
|  | Value | df | Asymptotic Significance (2-sided) | Monte Carlo Sig. (2-sided) | | | Monte Carlo Sig. (1-sided) | | |
| Significance | 99% Confidence Interval | | Significance | 99% Confidence Interval | |
| Lower Bound | Upper Bound | Lower Bound | Upper Bound |
| Pearson Chi-Square | 31.364a | 3 | <.001 | <.001b | <.001 | <.001 |  |  |  |
| Likelihood Ratio | 40.019 | 3 | <.001 | <.001b | <.001 | <.001 |  |  |  |
| Fisher-Freeman-Halton Exact Test | 36.440 |  |  | <.001b | <.001 | <.001 |  |  |  |
| Linear-by-Linear Association | 8.395c | 1 | .004 | .004b | .003 | .006 | .002b | <.001 | .003 |
| N of Valid Cases | 108 |  |  |  |  |  |  |  |  |
| a. 2 cells (25.0%) have expected count less than 5. The minimum expected count is 1.44. | | | | | | | | | |
| b. Based on 10000 sampled tables with starting seed 92208573. | | | | | | | | | |
| c. The standardised statistic is -2.897. | | | | | | | | | |

- 1. Question 9- Do you consider that the time for presentation of the main conclusion of the working groups in the plenary session was adequate?

| **TimePresent * Edition Crosstabulation** | | | | |
| --- | --- | --- | --- | --- |
| Count | | | | |
|  | | Edition | | Total |
| 1.00 | 2.00 |
| TimePresent | The time was to short | 2 | 5 | 7 |
| The time was longer than necessary | 1 | 5 | 6 |
| The time was adequate | 42 | 46 | 88 |
| Prefer not to answer | 7 | 0 | 7 |
| Total | | 52 | 56 | 108 |

| **Chi-Square Tests** | | | | | | | | | |
| --- | --- | --- | --- | --- | --- | --- | --- | --- | --- |
|  | Value | df | Asymptotic Significance (2-sided) | Monte Carlo Sig. (2-sided) | | | Monte Carlo Sig. (1-sided) | | |
| Significance | 99% Confidence Interval | | Significance | 99% Confidence Interval | |
| Lower Bound | Upper Bound | Lower Bound | Upper Bound |
| Pearson Chi-Square | 11.001a | 3 | .012 | .007b | .005 | .009 |  |  |  |
| Likelihood Ratio | 13.977 | 3 | .003 | .007b | .005 | .009 |  |  |  |
| Fisher-Freeman-Halton Exact Test | 11.053 |  |  | .007b | .005 | .009 |  |  |  |
| Linear-by-Linear Association | 6.865c | 1 | .009 | .010b | .007 | .012 | .005b | .004 | .007 |
| N of Valid Cases | 108 |  |  |  |  |  |  |  |  |
| a. 6 cells (75.0%) have expected count less than 5. The minimum expected count is 2.89. | | | | | | | | | |
| b. Based on 10000 sampled tables with starting seed 475497203. | | | | | | | | | |
| c. The standardised statistic is -2.620. | | | | | | | | | |

- 1. Question 10- Do you consider that the method used for discussion (roundtable in working groups) was adequate to achieve the learning goals?

| **Method * Edition Crosstabulation** | | | | |
| --- | --- | --- | --- | --- |
| Count | | | | |
|  | | Edition | | Total |
| 1.00 | 2.00 |
| Method | The method was adequate | 44 | 45 | 89 |
| The method was satisfactory, however was not the most adequate to achieve the leaning goals | 7 | 7 | 14 |
| The method was not adequate at all | 1 | 3 | 4 |
| Total | | 52 | 55 | 107 |

| **Chi-Square Tests** | | | | | | | | | |
| --- | --- | --- | --- | --- | --- | --- | --- | --- | --- |
|  | Value | df | Asymptotic Significance (2-sided) | Monte Carlo Sig. (2-sided) | | | Monte Carlo Sig. (1-sided) | | |
| Significance | 99% Confidence Interval | | Significance | 99% Confidence Interval | |
| Lower Bound | Upper Bound | Lower Bound | Upper Bound |
| Pearson Chi-Square | .928a | 2 | .629 | .772b | .762 | .783 |  |  |  |
| Likelihood Ratio | .974 | 2 | .615 | .772b | .762 | .783 |  |  |  |
| Fisher-Freeman-Halton Exact Test | .901 |  |  | .772b | .762 | .783 |  |  |  |
| Linear-by-Linear Association | .445c | 1 | .505 | .569b | .556 | .582 | .322b | .310 | .334 |
| N of Valid Cases | 107 |  |  |  |  |  |  |  |  |
| a. 2 cells (33.3%) have expected count less than 5. The minimum expected count is 1.94. | | | | | | | | | |
| b. Based on 10000 sampled tables with starting seed 1122541128. | | | | | | | | | |
| c. The standardised statistic is .667. | | | | | | | | | |

1. Podcast evaluation

| **podcast * Edition Crosstabulation** | | | | |
| --- | --- | --- | --- | --- |
| Count | | | | |
|  | | Edition | | Total |
| 1.00 | 2.00 |
| podcast | partially disagree | 1 | 0 | 1 |
| partially agree | 4 | 3 | 7 |
| fully agree | 7 | 14 | 21 |
| Total | | 12 | 17 | 29 |
|  | |  |  |  |

| **Chi-Square Tests** | | | | | | | | | |
| --- | --- | --- | --- | --- | --- | --- | --- | --- | --- |
|  | Value | df | Asymptotic Significance (2-sided) | Monte Carlo Sig. (2-sided) | | | Monte Carlo Sig. (1-sided) | | |
| Significance | 99% Confidence Interval | | Significance | 99% Confidence Interval | |
| Lower Bound | Upper Bound | Lower Bound | Upper Bound |
| Pearson Chi-Square | 2.694a | 2 | .260 | .265b | .254 | .277 |  |  |  |
| Likelihood Ratio | 3.042 | 2 | .219 | .265b | .254 | .277 |  |  |  |
| Fisher-Freeman-Halton Exact Test | 2.625 |  |  | .265b | .254 | .277 |  |  |  |
| Linear-by-Linear Association | 2.512c | 1 | .113 | .163b | .154 | .173 | .107b | .099 | .115 |
| N of Valid Cases | 29 |  |  |  |  |  |  |  |  |
| a. 4 cells (66.7%) have expected count less than 5. The minimum expected count is .41. | | | | | | | | | |
| b. Based on 10000 sampled tables with starting seed 957002199. | | | | | | | | | |
| c. The standardised statistic is 1.585. | | | | | | | | | |

1. Supplementary information - case study 1 evaluation between 1st and 2nd edition

Question - The supporting information of the case studies (explanations/examples/other sources suggestions) was clear.

| **CASESTUDY1 * EDITION Crosstabulation** | | | | |
| --- | --- | --- | --- | --- |
| Count | | | | |
|  | | EDITION | | Total |
| 1st edition | 2nd edition |
| CASESTUDY1 | partially disagree | 0 | 1 | 1 |
| partially agree | 7 | 4 | 11 |
| fully agree | 12 | 13 | 25 |
| Total | | 19 | 18 | 37 |

| **Chi-Square Tests** | | | | | | | | | |
| --- | --- | --- | --- | --- | --- | --- | --- | --- | --- |
|  | Value | df | Asymptotic Significance (2-sided) | Monte Carlo Sig. (2-sided) | | | Monte Carlo Sig. (1-sided) | | |
| Significance | 99% Confidence Interval | | Significance | 99% Confidence Interval | |
| Lower Bound | Upper Bound | Lower Bound | Upper Bound |
| Pearson Chi-Square | 1.832a | 2 | .400 | .475b | .462 | .487 |  |  |  |
| Likelihood Ratio | 2.228 | 2 | .328 | .475b | .462 | .487 |  |  |  |
| Fisher-Freeman-Halton Exact Test | 1.756 |  |  | .475b | .462 | .487 |  |  |  |
| Linear-by-Linear Association | .039c | 1 | .843 | 1.000b | 1.000 | 1.000 | .542b | .529 | .555 |
| N of Valid Cases | 37 |  |  |  |  |  |  |  |  |
| a. 2 cells (33.3%) have expected count less than 5. The minimum expected count is .49. | | | | | | | | | |
| b. Based on 10000 sampled tables with starting seed 475497203. | | | | | | | | | |
| c. The standardised statistic is .198. | | | | | | | | | |
